# Supplementary material
Source: Royal Society of Chemistry journal article supplement (doi:10.1039/d6cy00201c)
Supplement: d6cy00201c1.pdf [file d6cy00201c1.pdf]

**Supporting information for**

**Proximity-Guided Control of Framework Al Pairs in ZSM-5 for Enhancing Hydride Transfer and Aromatics  
Formation in Propane-DME Co-aromatization**

Xia Li <sup>a,b,c</sup>, Pengfei Li <sup>b,c</sup>, Kui Tang <sup>a,b,c</sup>, Wei Zhao <sup>a,b,c</sup>, Yujie Xie <sup>a,b,c</sup>, Xuemin Cao <sup>a,b,c</sup>, Peng He <sup>a,b,c</sup> \*

<sup>a</sup> *State Key Laboratory of Coal Conversion, Institute of Coal Chemistry, Chinese Academy of Sciences, Taiyuan  
030001, China*

<sup>b</sup> *School of Chemical Engineering, University of Chinese Academy of Sciences, Beijing 100049, China*

<sup>c</sup> *National Energy Center for Coal to Clean Fuels, Synfuels China Technology Co., Ltd., Beijing 101407, China*

\*Corresponding author. E-mail:

[hepeng@sxicc.ac.cn](mailto:hepeng@sxicc.ac.cn) (P.H.)

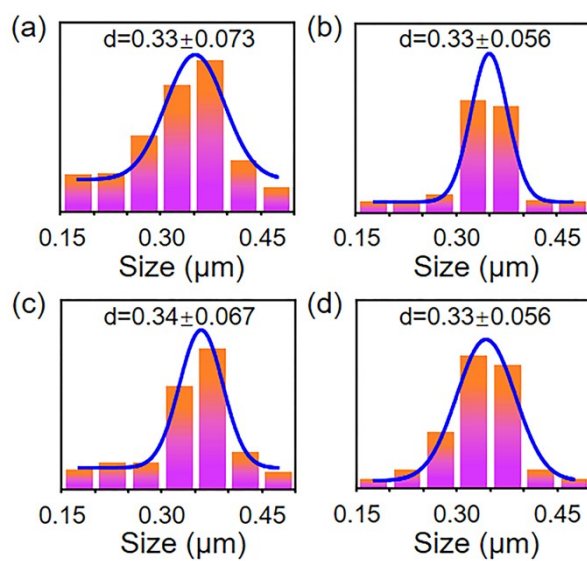

**Fig. S1.** Particle size distribution of (a) H-Z5-50, (b) H-Z5-62, (c) H-Z5-78, (d) H-Z5-54. The average particle size is also labelled.

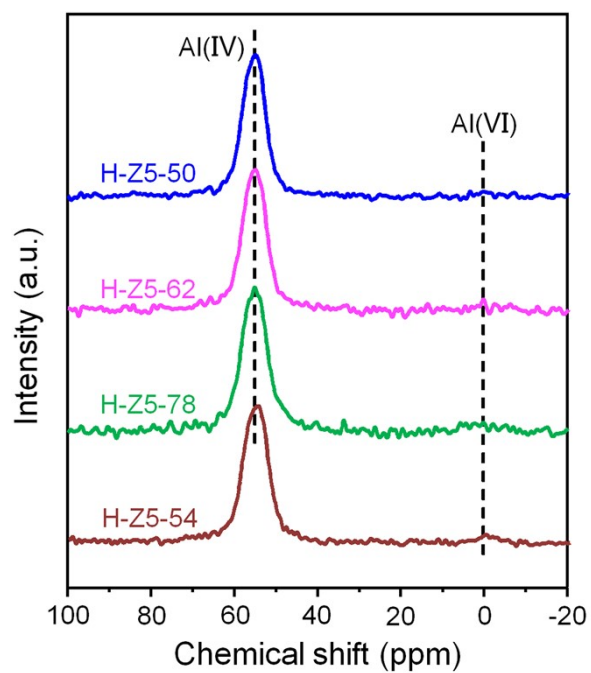

**Fig. S2.** Solid state  $^{27}\text{Al}$  MAS NMR spectra of the HZSM-5 zeolites with varying Al-pair fractions.

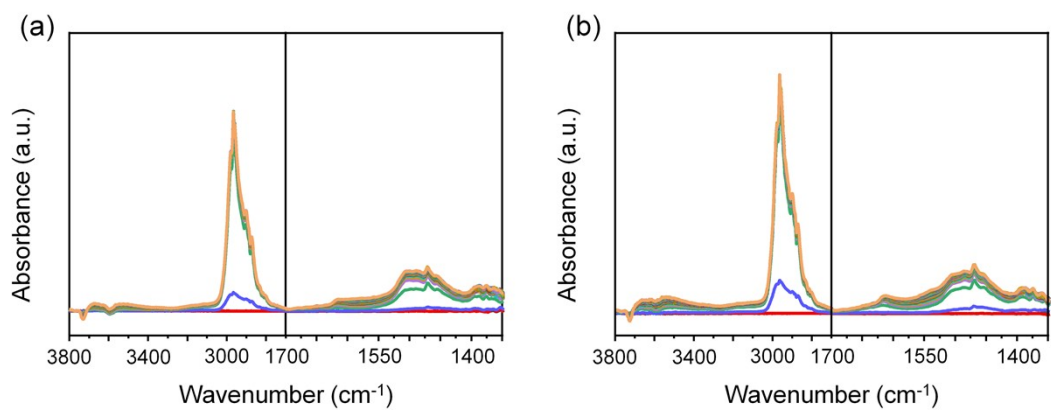

**Fig. S3.** Development of FTIR spectra for H-Z5-50 (a) and H-Z5-78 (b) at 400 °C depending on TOS for the co-aromatization of propane and DME.

**Table S1.** The conversion of propane and the distribution of products over the HZSM-5 catalysts during sole propane aromatization and the co-aromatization of propane and DME.

| Sole propane aromatization          |                                                    |                                 |                |                |                                 |           |
|-------------------------------------|----------------------------------------------------|---------------------------------|----------------|----------------|---------------------------------|-----------|
| Catalysts                           | Conversion of C <sub>3</sub> H <sub>8</sub><br>(%) | Selectivity (%)                 |                |                |                                 |           |
|                                     |                                                    | C <sub>1</sub> + C <sub>2</sub> | C <sup>=</sup> | C <sub>4</sub> | C <sub>5</sub> + C <sub>6</sub> | Aromatics |
| H-Z5-50                             | 2.6                                                | 26.6                            | 34.5           | 36.5           | 2.4                             |           |
| H-Z5-62                             | 3.4                                                | 25.1                            | 31.7           | 40.7           | 2.5                             | -         |
| H-Z5-78                             | 3.7                                                | 24.2                            | 24.3           | 48.9           | 2.6                             | -         |
| H-Z5-54                             | 2.8                                                | 25.5                            | 29.7           | 42.3           | 2.5                             | -         |
| Co-aromatization of propane and DME |                                                    |                                 |                |                |                                 |           |
| Catalysts                           | Conversion of C <sub>3</sub> H <sub>8</sub><br>(%) | Selectivity (%)                 |                |                |                                 |           |
|                                     |                                                    | C <sub>1</sub> + C <sub>2</sub> | C <sup>=</sup> | C <sub>4</sub> | C <sub>5</sub> + C <sub>6</sub> | Aromatics |
| H-Z5-50                             | 3.3                                                | 10.2                            | 21.6           | 53.9           | 2.5                             | 11.8      |
| H-Z5-62                             | 4.1                                                | 10.9                            | 18.1           | 56.0           | 2.4                             | 12.6      |
| H-Z5-78                             | 4.8                                                | 12.5                            | 16.2           | 56.1           | 2.2                             | 13.0      |
| H-Z5-54                             | 3.7                                                | 11.4                            | 19.3           | 54.6           | 2.4                             | 12.3      |

Reaction conditions: 400 °C, 1 bar, WHSV = 0.9 h<sup>-1</sup>, C-mol% of DME in the co-feedstock = 5 %.

**Table S2.** The conversion of propane and the distribution of products over the HZ-SH-2 and HZ-SH-6 at different temperature during sole propane aromatization and the co-aromatization of propane and DME.

| Sole propane aromatization          |           |                                                    |                                 |                |                |                                 |           |
|-------------------------------------|-----------|----------------------------------------------------|---------------------------------|----------------|----------------|---------------------------------|-----------|
| Temp<br>(°C)                        | Catalysts | Conversion of<br>C <sub>3</sub> H <sub>8</sub> (%) | Selectivity (%)                 |                |                |                                 |           |
|                                     |           |                                                    | C <sub>1</sub> + C <sub>2</sub> | C <sup>=</sup> | C <sub>4</sub> | C <sub>5</sub> + C <sub>6</sub> | Aromatics |
| 400                                 | H-Z5-50   | 2.6                                                | 26.6                            | 34.5           | 36.5           | 2.4                             | -         |
|                                     | H-Z5-78   | 3.7                                                | 24.2                            | 24.3           | 48.9           | 2.6                             | -         |
| 450                                 | H-Z5-50   | 8.1                                                | 28.9                            | 34.5           | 31.4           | 1.5                             | 3.7       |
|                                     | H-Z5-78   | 11.4                                               | 28.8                            | 24.4           | 35.2           | 1.6                             | 10.0      |
| 500                                 | H-Z5-50   | 22.4                                               | 34.7                            | 32.3           | 13.9           | 0.9                             | 18.2      |
|                                     | H-Z5-78   | 30.5                                               | 37.2                            | 24.0           | 14.5           | 0.6                             | 23.7      |
| Co-aromatization of propane and DME |           |                                                    |                                 |                |                |                                 |           |
| Temp<br>(°C)                        | Catalysts | Conversion of<br>C <sub>3</sub> H <sub>8</sub> (%) | Selectivity (%)                 |                |                |                                 |           |
|                                     |           |                                                    | C <sub>1</sub> + C <sub>2</sub> | C <sup>=</sup> | C <sub>4</sub> | C <sub>5</sub> + C <sub>6</sub> | Aromatics |
| 400                                 | H-Z5-50   | 3.3                                                | 10.2                            | 21.6           | 53.9           | 2.5                             | 11.8      |
|                                     | H-Z5-78   | 4.8                                                | 12.5                            | 16.2           | 56.1           | 2.2                             | 13.0      |
| 450                                 | H-Z5-50   | 9.6                                                | 23.7                            | 30.2           | 34.8           | 2.0                             | 9.3       |
|                                     | H-Z5-78   | 13.2                                               | 26.5                            | 23.3           | 35.4           | 1.5                             | 13.3      |
| 500                                 | H-Z5-50   | 24.4                                               | 33.4                            | 31.0           | 16.1           | 0.9                             | 18.6      |
|                                     | H-Z5-78   | 31.9                                               | 36.4                            | 23.2           | 14.8           | 0.6                             | 25.0      |

Reaction conditions: 1 bar, WHSV = 0.9 h<sup>-1</sup>, C-mol% of DME in the co-feedstock = 5 %.

**Table S3.** Characteristic IR frequencies of OH groups and carbenium ions vibration assignment.

| Frequency (cm <sup>-1</sup> ) | Assignment                                                           |
|-------------------------------|----------------------------------------------------------------------|
| 3728                          | $\nu(\text{OH})$ Si-OH terminal                                      |
| 3601                          | $\nu(\text{OH})$ SiOHAl of framework Al                              |
| 2967                          | $\nu_{\text{asym}}(\text{CH}_2)$ Saturated oligomeric carbenium ions |
| 2902                          | $\nu_{\text{asym}}(\text{CH}_3)$                                     |
| 2872                          | $\nu_{\text{sym}}(\text{CH}_2)$                                      |
| 2889                          | $\nu_{\text{sym}}(\text{CH}_3)$                                      |
| 1632                          | $\pi$ -adsorbed C <sub>3</sub> H <sub>8</sub> to SiOHAl              |
| 1618                          | $\pi$ -adsorbed C <sub>2</sub> H <sub>4</sub> to SiOHAl              |
| 1608                          | Aromatic carbenium ions                                              |
| 1586                          | dienyl carbenium ions                                                |
| 1538                          | Poly- or cyclic-enyl carbenium ions                                  |
| 1505                          | Mono-enyl carbenium ions                                             |
| 1440-1486                     | $\delta(\text{CH}_2)$ and $\delta(\text{CH}_3)$                      |

**Table S4.** The activation free energy barrier ( $G_a$ ) and reaction free energy ( $\Delta G_r$ ) for the hydrogen transfer and chain growth reactions mediated by ZOCH<sub>3</sub> on single Al and Al pairs (in eV).

|                                                                                                                            | single Al |              | Al pairs |              |
|----------------------------------------------------------------------------------------------------------------------------|-----------|--------------|----------|--------------|
|                                                                                                                            | $G_a$     | $\Delta G_r$ | $G_a$    | $\Delta G_r$ |
| $\text{ZOCH}_3 + \text{C}_3\text{H}_8 \rightarrow \text{ZOH} + \text{C}_3\text{H}_6 + \text{CH}_4$                         | 0.86      | -0.33        | 0.70     | -0.28        |
| $\text{ZOCH}_3 + \text{C}_3\text{H}_6 \rightarrow \text{ZO}^- + \text{C}_4\text{H}_9^+$                                    | 0.55      | 0.12         | 0.48     | -0.06        |
| $\text{ZO}^- + \text{C}_3\text{H}_8 + \text{C}_4\text{H}_9^+ \rightarrow \text{ZOC}_3\text{H}_7 + \text{C}_4\text{H}_{10}$ | 0.44      | -0.14        | 0.28     | -0.37        |

**Table S5.** Computed energy contributions for hydrogen transfer and chain growth processes at 773K.

Hydrogen transfer:

| Isolated Al H-ZSM-5 |          |              |                           |                 |                              |         |
|---------------------|----------|--------------|---------------------------|-----------------|------------------------------|---------|
|                     | E        | $\Delta$ ZPE | $\Delta$ ZPE-T $\Delta$ S | E+ $\Delta$ ZPE | E+ $\Delta$ ZPE-T $\Delta$ S | G(773K) |
| 1                   | -2386.38 | 3.82         | 2.65                      | -2382.56        | -2383.74                     | -0.03   |
| 2                   | -2385.26 | 3.65         | 2.39                      | -2381.61        | -2382.88                     | 0.83    |
| 3                   | -2385.35 | 3.65         | 2.16                      | -2381.70        | -2383.19                     | 0.51    |
| 4                   | -2386.19 | 3.66         | 2.13                      | -2382.53        | -2384.06                     | -0.36   |
| Paired Al H-ZSM-5   |          |              |                           |                 |                              |         |
|                     | E        | $\Delta$ ZPE | $\Delta$ ZPE-T $\Delta$ S | E+ $\Delta$ ZPE | E+ $\Delta$ ZPE-T $\Delta$ S | G(773K) |
| 1                   | -2388.02 | 3.82         | 2.60                      | -2384.20        | -2385.42                     | -0.12   |
| 2                   | -2387.06 | 3.66         | 2.35                      | -2383.40        | -2384.72                     | 0.58    |
| 3                   | -2386.96 | 3.65         | 2.07                      | -2383.31        | -2384.89                     | 0.41    |
| 4                   | -2387.84 | 3.67         | 2.14                      | -2384.17        | -2385.69                     | -0.40   |

Chain growth:

| Isolated Al H-ZSM-5 |          |              |                           |                 |                              |         |
|---------------------|----------|--------------|---------------------------|-----------------|------------------------------|---------|
|                     | E        | $\Delta$ ZPE | $\Delta$ ZPE-T $\Delta$ S | E+ $\Delta$ ZPE | E+ $\Delta$ ZPE-T $\Delta$ S | G(773K) |
| 5                   | -2377.96 | 3.18         | 2.05                      | -2374.78        | -2375.92                     | -0.05   |
| 6                   | -2377.21 | 3.14         | 1.85                      | -2374.07        | -2375.36                     | 0.50    |
| 7                   | -2377.93 | 3.17         | 2.14                      | -2374.77        | -2375.79                     | 0.07    |
| 8                   | -2436.01 | 5.96         | 4.02                      | -2430.05        | -2431.99                     | -1.03   |
| 9                   | -2435.48 | 5.94         | 3.93                      | -2429.54        | -2431.55                     | -0.59   |
| 10                  | -2436.42 | 6.13         | 4.29                      | -2430.29        | -2432.13                     | -1.17   |
| Paired Al H-ZSM-5   |          |              |                           |                 |                              |         |
|                     | E        | $\Delta$ ZPE | $\Delta$ ZPE-T $\Delta$ S | E+ $\Delta$ ZPE | E+ $\Delta$ ZPE-T $\Delta$ S | G(773K) |
| 5                   | -2379.59 | 3.18         | 2.03                      | -2376.41        | -2377.56                     | -0.10   |
| 6                   | -2379.08 | 3.15         | 2.01                      | -2375.93        | -2377.08                     | 0.38    |
| 7                   | -2379.59 | 3.17         | 1.97                      | -2376.42        | -2377.62                     | -0.16   |
| 8                   | -2437.67 | 5.96         | 3.99                      | -2431.72        | -2433.68                     | -1.13   |
| 9                   | -2437.31 | 5.94         | 3.91                      | -2431.37        | -2433.40                     | -0.85   |
| 10                  | -2438.12 | 6.12         | 4.32                      | -2431.99        | -2433.80                     | -1.25   |

1, 2, 3, 4, 5, 6, 7, 8, 9, and 10 denote the corresponding elementary steps  $\text{ZOCH}_3 + \text{C}_3\text{H}_8$ , TS,  $\text{ZO}^+ + \text{C}_3\text{H}_7^+ + \text{CH}_4$ ,  $\text{ZOH} + \text{C}_3\text{H}_6 + \text{CH}_4$ ,  $\text{ZOH} + \text{C}_3\text{H}_6$ , TS1,  $\text{ZO}^+ + \text{C}_4\text{H}_9^+ + \text{CH}_4$ ,  $\text{ZO}^+ + \text{C}_3\text{H}_8 + \text{C}_4\text{H}_9^+$ , TS2 and  $\text{ZOC}_3\text{H}_7 + \text{C}_4\text{H}_{10}$ , respectively.
